# Supplementary material
Source: PubMed Central journal article supplement (PMC9831746)
Supplement: NIHMS1859808-supplement-Supp_Materials.pdf [file NIHMS1859808-supplement-Supp_Materials.pdf]

# Supporting Information for “Causal comparative effectiveness analysis of dynamic continuous-time treatment initiation rules with sparsely measured outcomes and death” by Liangyuan Hu and Joseph W. Hogan

December 21, 2018

## Appendix A

### A.1 Model specification for imputations

The specific formulation used in our example models the CD4 trajectory in terms of 4 parameters: an intercept  $\beta_0$ , pre-treatment slope  $\beta_1$ , an instantaneous effect of ART at the time of initiation, captured in terms of a jump of size  $\beta_2$ , and a post-treatment slope  $\beta_4$ . Each of these temporal components is allowed to vary by individual, giving rise to subject-specific random effects  $b_i = (b_{0i}, b_{1i}, b_{2i}, b_{3i})^\top$ .

The model further includes main effects of baseline covariates, plus an interaction between baseline covariates and the pre- and post-treatment slopes. The specific formulation is

$$\begin{aligned} m_i(t) = & (\beta_0 + b_{0i}) + (\beta_1 + b_{1i})t + (\beta_2 + b_{2i})N_i^A(t) + (\beta_3 + b_{3i})(t - A_i)_+ \\ & + L_i(0) \{ \psi_0 + \psi_1 t + \psi_2 N_i^A(t) + \psi_3 (t - A_i)_+ \}, \end{aligned} \quad (1)$$

where  $a_+ = \max(0, a)$  is the positive part of  $a$ , and the  $\psi$  parameters represent coefficients for the main effect of  $L_i(0)$  and its interaction with the trajectory terms. Hence the time trajectory differs by covariate profile, and within covariate profile further varies by individual, thus providing a rich structure for modeling true CD4 count. Components of  $L_i(0)$  include the following: age at baseline (modeled with cubic spline), CDC symptom class (5-level categorical variable with levels mild (A), moderate (B), severe (C), asymptomatic (N) and missing); gender (1=male, 0=female); and CD4 cell count category (5 level categorical variable with categories 0-199, 200-349, 350-499, over 500, and missing). Time varying covariates include treatment initiation  $N^A(t)$ . Parameters for the fitted model appear in Table 1. Residual-versus-fitted plots (Figure 1) and examination of individual-specific fitted curves are used to assess fit of the CD4 submodel (see Figure 2 for a sample of 9 individuals).

The survival submodel specification is given in equation (11) in the main text. Baseline covariates include age at baseline (fitted using cubic spline), gender, CD4 categories as listed above and CDC class as listed above. Time varying covariates include treatment initiation  $N^A(t)$  and current CD4 count  $\widehat{m}(t)$ . The fitted model appears in Table 3; the shape of the relationship between mortality and  $m(t)$  appears in Figure 3, indicating a strong negative and nonlinear relationship (higher CD4 implies lower mortality).

We tested the proportional hazards assumption for each covariate using Schoenfeld residuals; test results appear in Table 4. There is no evidence that any of the covariates violate the proportional hazards assumption.

## A.2 Imputation algorithm

For those whose follow up is censored prior to  $t^*$ , we first impute a death indicator at  $t^*$ ; for those whose imputed status is ‘alive’, we then impute a CD4 count. For those who are in follow-up at  $t^*$  but do not have an observed CD4 proximal to  $t^*$ , we impute a CD4 count at  $t^*$ . The specific imputation strategy is as follows

1. For those still in follow up at  $t^*$  but missing a proximal CD4 count, impute CD4 at time  $t^*$  by drawing  $\tilde{X} \sim N(\hat{m}_i(t^*), \hat{\sigma}^2(t^*))$ , where  $\hat{m}_i(t^*)$  is the individual-specific prediction of true CD4 count.
2. For those whose follow up is censored at  $C_i < t^*$ ,

- (a) Calculate  $\hat{S}_i^T(t^* | T > C_i)$ , the estimated probability of survival at time  $t^*$  conditional on surviving to time  $C_i$ . Referring to equation (11) in the main text, note that

$$\hat{S}_i^T(t) = \exp \left[ - \int_0^t \exp \{ g_1(\hat{m}_i(s); \hat{\gamma}_1) + g_2(L_i(0), N_i^A(s); \hat{\gamma}_2) \} d\hat{\Lambda}_0^T(s) \right],$$

where  $\hat{\Lambda}_0^T(s)$  is the estimated cumulative baseline hazard function for mortality. Hence

$\hat{S}_i^T(t)$  can be estimated directly from the fitted hazard model, and  $\hat{S}_i^T(t^* | T > C_i) =$

$$\hat{S}_i^T(t^*) / \hat{S}_i^T(C_i).$$

- (b) Draw a binary death indicator  $\tilde{D}_i \sim \text{Bernoulli}(1 - \hat{S}_i^T(t | T > C_i))$ .
- (c) If  $\tilde{D}_i = 1$  then set  $\tilde{X}_i = 0$ ; else draw a missing CD4 count  $\tilde{Y}$  as in step 1 above.

3. Return  $\tilde{X}_i$ .

### A.3 Variance calculations

Let  $M$  denote the number of imputations for each missing observation, leading to  $M$  completed datasets. For each completed dataset, bootstrap resampling is used to compute the point estimator for the target parameters and its within-imputation variance. Let  $S$  denote the number of bootstrap samples on each of the  $M$  completed datasets, and for  $s = 1, \dots, S$  and  $m = 1, \dots, M$ , let  $\tilde{\theta}_{qj}^{(s,m)}$ ,  $j = 1, 2, 3$ , denote the point estimate of  $\theta_{qj}$  derived from bootstrap sample  $s$  drawn from imputed dataset  $m$ . For imputed dataset  $m$ , the average of the point estimates across bootstrap samples is  $\tilde{\theta}_{qj}^{(m)} = S^{-1} \sum_{s=1}^S \tilde{\theta}_{qj}^{(s,m)}$ ; hence the within-imputation variance estimator of  $\text{Var}(\tilde{\theta}^{(m)})$  is  $\widehat{V}^{(m)} = (S - 1)^{-1} \sum_{s=1}^S \left( \tilde{\theta}_{qj}^{(s,m)} - \tilde{\theta}_{qj}^{(m)} \right)^2$ , and the estimate of within-imputation variance is

$$W = \frac{1}{M} \sum_{m=1}^M \widehat{V}^{(m)}.$$

The between-imputation variance estimator is

$$B = \frac{1}{M - 1} \sum_{m=1}^M \left( \tilde{\theta}_{qj}^{(m)} - \widehat{\theta}_{qj} \right)^2,$$

where  $\widehat{\theta}_{qj} = M^{-1} \sum_{m=1}^M \tilde{\theta}_{qj}^{(m)}$  is the mean over all imputation-specific estimates. Hence the estimator of total variance is  $\widehat{\text{Var}}(\widehat{\theta}_{qj}) = W + (1 + 1/M)B$ .

To compute confidence intervals for point estimates, we assumed the (bootstrap) sampling distributions were well-approximated by a normal distribution, which was verified using q-q plots. Confidence intervals for mortality rates were based on a logit transformation of the sampling distribution.

## Appendix B

### B.1 Sensitivity analysis for weight truncation

To assess the impact of weight truncation on the estimation of the causal effects of DTRs, we conduct a sensitivity analysis describing estimated differences in mortality rate and median of  $X_q$  between dynamic regimes  $q = \infty$  and  $q = 500$  for  $t^* = 1$  year and  $t^* = 2$  years. We truncate the stabilized regime weights at the top and bottom 5%, 2.5% and 0% (no truncation). The results, shown in Table 1, suggest the point estimates and the confidence intervals for treatment effect on mortality were unchanged with different weighting schemes. Point estimates and variation associated with treatment effect on the composite outcome increased with less truncation; the confidence intervals indicated greater variability but no change in substantive conclusion about treatment effect. For the denominator weight model, we tested the proportional hazards assumption for each term included in the model and found no violations of the assumption. We summarize the distribution of the estimated weights for DTRs  $q = \infty$  and  $q = 500$  in Table 2.

Table 1: Sensitivity analysis depicting estimated differences in mortality rate and median of  $X_q$  between dynamic regimes  $q = \infty$  and  $q = 500$  for  $t^* = 1$  year and  $t^* = 2$  years. Comparison includes weight IPTW truncation at top and bottom 5%, top and bottom 2.5%, and no truncation. The parameter  $\theta_{q1} = P(X_q = 0) = F_{X_q}(0)$  is the mortality rate, and  $\theta_{q2} = F_{X_q}^{-1}(\frac{1}{2})$  is the median of  $X_q$ . The 95% confidence intervals are shown below the point estimates.

|                         | 5%                      | 2.5%                    | no truncation           |
|-------------------------|-------------------------|-------------------------|-------------------------|
| $t^* = 1$               |                         |                         |                         |
| $\widehat{\theta}_{q1}$ | -.008<br>(-.015, -.001) | -.008<br>(-.014, -.001) | -.008<br>(-.014, -.001) |
| $\widehat{\theta}_{q2}$ | 41<br>(12, 70)          | 50<br>(14, 86)          | 75<br>(16, 134)         |
| $t^* = 2$               |                         |                         |                         |
| $\widehat{\theta}_{q1}$ | -.013<br>(-.023, -.004) | -.014<br>(-.023, -.005) | -.013<br>(-.022, -.004) |
| $\widehat{\theta}_{q2}$ | 51<br>(14, 87)          | 56<br>(15, 98)          | 81<br>(11, 150)         |

Table 2: Distribution of inverse probability of treatment weights (IPTW) for dynamic treatment regimes  $q = 500$  and  $q = \infty$  at time points  $t = 1$  and  $t = 2$  years.

|              | min  | 2.5% | 5%   | median | 95%   | 97.5% | max    |
|--------------|------|------|------|--------|-------|-------|--------|
| $t^* = 1$    |      |      |      |        |       |       |        |
| $q = \infty$ | 0.86 | 3.57 | 5.46 | 18.01  | 66.10 | 83.20 | 112.00 |
| $q = 500$    | 0.46 | 1.10 | 2.62 | 11.13  | 20.60 | 31.90 | 77.21  |
| $t^* = 2$    |      |      |      |        |       |       |        |
| $q = \infty$ | 0.86 | 4.03 | 5.86 | 22.12  | 68.10 | 85.32 | 112.00 |
| $q = 500$    | 0.68 | 1.80 | 3.04 | 16.14  | 26.60 | 33.50 | 85.12  |

# Appendix C

## C.1 Supplemental tables and figures

Table 3: Fitted CD4 submodel: Fixed effect estimates. See equation (1) for full model specification.

Number of Observations: 10036

Number of Groups: 1962

|                       | Value     | Std.Error | DF   | t-value   | p-value |
|-----------------------|-----------|-----------|------|-----------|---------|
| (Intercept)           | 19.792310 | 0.5440822 | 8043 | 36.37743  | 0.0000  |
| ns(age_c, df = 4)1    | -0.826791 | 0.5297732 | 1948 | -1.56065  | 0.1188  |
| ns(age_c, df = 4)2    | -1.313378 | 0.5219090 | 1948 | -2.51649  | 0.0119  |
| ns(age_c, df = 4)3    | -4.221976 | 1.0584546 | 1948 | -3.98881  | 0.0001  |
| ns(age_c, df = 4)4    | -1.298521 | 0.5451897 | 1948 | -2.38178  | 0.0173  |
| classA                | -0.358940 | 0.4022471 | 1948 | -0.89234  | 0.3723  |
| classB                | -0.281527 | 0.6411768 | 1948 | -0.43908  | 0.6607  |
| classC                | -0.973655 | 0.6348106 | 1948 | -1.53377  | 0.1252  |
| classN                | 1.101933  | 0.4123147 | 1948 | 2.67255   | 0.0076  |
| male                  | -0.696516 | 0.2411600 | 1948 | -2.88819  | 0.0039  |
| cd4.0                 | -9.822384 | 0.3967882 | 1948 | -24.75473 | 0.0000  |
| cd4.200               | -1.266265 | 0.4349427 | 1948 | -2.91134  | 0.0036  |
| cd4.350               | 2.396883  | 0.4608261 | 1948 | 5.20127   | 0.0000  |
| cd4.500               | 9.185741  | 0.4224343 | 1948 | 21.74478  | 0.0000  |
| N^A(t)                | 3.498966  | 0.3951127 | 8043 | 8.85561   | 0.0000  |
| N^A(t):classA         | 0.098775  | 0.4454290 | 8043 | 0.22175   | 0.8245  |
| N^A(t):classB         | -0.589170 | 0.6250478 | 8043 | -0.94260  | 0.3459  |
| N^A(t):classC         | 0.293096  | 0.6847882 | 8043 | 0.42801   | 0.6687  |
| N^A(t):classN         | -0.876555 | 0.5074726 | 8043 | -1.72730  | 0.0842  |
| N^A(t):male           | 0.505273  | 0.2750455 | 8043 | 1.83705   | 0.0662  |
| N^A(t):cd4.0          | 4.769437  | 0.4305617 | 8043 | 11.07724  | 0.0000  |
| N^A(t):cd4.200        | 2.250686  | 0.4743306 | 8043 | 4.74497   | 0.0000  |
| N^A(t):cd4.350        | -0.746502 | 0.5376364 | 8043 | -1.38849  | 0.1650  |
| N^A(t):cd4.500        | -2.363437 | 0.5140559 | 8043 | -4.59763  | 0.0000  |
| N^A(t) : time to ARV  | -0.001267 | 0.0003672 | 8043 | -3.45096  | 0.0006  |
| preArtMonths (t)      | -0.054122 | 0.0206962 | 8043 | -2.61508  | 0.0089  |
| classA:preArtMonths   | 0.001707  | 0.0251862 | 8043 | 0.06778   | 0.9460  |
| classB:preArtMonths   | 0.021122  | 0.0452437 | 8043 | 0.46685   | 0.6406  |
| classC:preArtMonths   | 0.068495  | 0.0824450 | 8043 | 0.83079   | 0.4061  |
| classN:preArtMonths   | 0.008884  | 0.0245975 | 8043 | 0.36116   | 0.7180  |
| male:preArtMonths     | 0.030871  | 0.0174449 | 8043 | 1.76965   | 0.0768  |
| cd4.0:preArtMonths    | 0.124723  | 0.0471944 | 8043 | 2.64274   | 0.0082  |
| cd4.200:preArtMonths  | -0.038744 | 0.0324292 | 8043 | -1.19472  | 0.2322  |
| cd4.350:preArtMonths  | -0.016200 | 0.0273300 | 8043 | -0.59277  | 0.5534  |
| cd4.500:preArtMonths  | -0.097350 | 0.0230936 | 8043 | -4.21545  | 0.0000  |
| postArtMonths (t-A)_+ | 0.067137  | 0.0246488 | 8043 | 2.72374   | 0.0065  |
| classA:postArtMonths  | -0.006954 | 0.0307434 | 8043 | -0.22619  | 0.8211  |
| classB:postArtMonths  | -0.039469 | 0.0517607 | 8043 | -0.76252  | 0.4458  |
| classC:postArtMonths  | -0.067821 | 0.0871196 | 8043 | -0.77848  | 0.4363  |
| classN:postArtMonths  | -0.031397 | 0.0343065 | 8043 | -0.91518  | 0.3601  |
| male:postArtMonths    | -0.071645 | 0.0211673 | 8043 | -3.38470  | 0.0007  |
| cd4.0:postArtMonths   | -0.090715 | 0.0494893 | 8043 | -1.83301  | 0.0668  |

Table 4: Fitted CD4 submodel: Random effects variance estimates and distribution of residuals.

Random effects:

Formula: ~preArtMonths + postArtMonths | ptidno

Structure: General positive-definite, Log-Cholesky parametrization

|               | StdDev     | Corr          |
|---------------|------------|---------------|
| (Intercept)   | 3.91359199 | (Intr) prArtM |
| preArtMonths  | 0.09076454 | 0.386         |
| postArtMonths | 0.16232370 | -0.275 -0.454 |
| Residual      | 3.96196571 |               |

Standardized Within-Group Residuals:

| Min          | Q1           | Med          | Q3          | Max         |
|--------------|--------------|--------------|-------------|-------------|
| -4.710810881 | -0.506312643 | -0.004719634 | 0.484378098 | 6.595537128 |



Table 5: Fitted mortality model.

n= 156368, number of events= 124

|                            | coef      | exp(coef) | se(coef) | z      | Pr(> z ) |     |
|----------------------------|-----------|-----------|----------|--------|----------|-----|
| ns(predicted.cd4, df = 4)1 | -5.529860 | 0.003967  | 0.735769 | -7.516 | 5.66e-14 | *** |
| ns(predicted.cd4, df = 4)2 | -4.577166 | 0.010284  | 1.052191 | -4.350 | 1.36e-05 | *** |
| ns(predicted.cd4, df = 4)3 | -6.900041 | 0.001008  | 1.959493 | -3.521 | 0.000429 | *** |
| ns(predicted.cd4, df = 4)4 | -1.715574 | 0.179861  | 2.560207 | -0.670 | 0.502799 |     |
| male                       | 0.009160  | 1.009202  | 0.183325 | 0.050  | 0.960150 |     |
| ns(age_c, df = 3)1         | 0.850156  | 2.340011  | 0.377932 | 2.249  | 0.024481 | *   |
| ns(age_c, df = 3)2         | -0.335923 | 0.714678  | 0.834747 | -0.402 | 0.687372 |     |
| ns(age_c, df = 3)3         | -0.273305 | 0.760861  | 0.381530 | -0.716 | 0.473782 |     |
| cd4.0                      | 0.123630  | 1.131597  | 0.547881 | 0.226  | 0.821473 |     |
| cd4.200                    | 0.900486  | 2.460800  | 0.590938 | 1.524  | 0.127552 |     |
| cd4.350                    | 0.689812  | 1.993340  | 0.744415 | 0.927  | 0.354109 |     |
| cd4.500                    | -0.965751 | 0.380697  | 1.135172 | -0.851 | 0.394906 |     |
| classA                     | 0.275909  | 1.317728  | 0.271891 | 1.015  | 0.310211 |     |
| classB                     | 0.182826  | 1.200605  | 0.396747 | 0.461  | 0.644934 |     |
| classC                     | 0.414840  | 1.514128  | 0.374118 | 1.109  | 0.267496 |     |
| classN                     | -0.280110 | 0.755701  | 0.431519 | -0.649 | 0.516258 |     |
| postArtMonths (t-A)_+      | -0.036337 | 0.964315  | 0.010400 | -3.494 | 0.000476 | *** |
| N^A(t)                     | 1.147999  | 3.151881  | 0.523526 | 2.193  | 0.028320 | *   |
| N^A(t):cd4.0               | -0.077731 | 0.925214  | 0.601829 | -0.129 | 0.897233 |     |
| N^A(t):cd4.200             | -0.587494 | 0.555718  | 0.697165 | -0.843 | 0.399402 |     |
| N^A(t):cd4.350             | -0.737121 | 0.478489  | 0.918659 | -0.802 | 0.422328 |     |
| N^A(t):cd4.500             | 0.986362  | 2.681461  | 1.197227 | 0.824  | 0.410012 |     |
| ---                        |           |           |          |        |          |     |

Table 6: Proportional hazards test on covariates for mortality submodel.

|                            | rho      | chisq    | p     |
|----------------------------|----------|----------|-------|
| male                       | 0.07305  | 6.79e-01 | 0.410 |
| ns(age_c, df = 3)1         | -0.09634 | 1.09e+00 | 0.297 |
| ns(age_c, df = 3)2         | -0.08321 | 8.62e-01 | 0.353 |
| ns(age_c, df = 3)3         | -0.05758 | 3.17e-01 | 0.573 |
| cd4.0                      | -0.12566 | 1.62e+00 | 0.202 |
| cd4.200                    | 0.00635  | 4.86e-03 | 0.944 |
| cd4.350                    | -0.02277 | 6.34e-02 | 0.801 |
| cd4.500                    | 0.03056  | 1.11e-01 | 0.739 |
| classA                     | 0.09080  | 1.06e+00 | 0.303 |
| classB                     | 0.10337  | 1.33e+00 | 0.248 |
| classC                     | -0.13256 | 2.20e+00 | 0.138 |
| classN                     | 0.10103  | 1.31e+00 | 0.252 |
| ns(predicted.cd4, df = 4)1 | -0.15634 | 2.25e+00 | 0.133 |
| ns(predicted.cd4, df = 4)2 | -0.12531 | 1.31e+00 | 0.252 |
| ns(predicted.cd4, df = 4)3 | -0.05161 | 2.45e-01 | 0.621 |
| ns(predicted.cd4, df = 4)4 | 0.06332  | 3.11e-01 | 0.577 |
| postArtMonths              | 0.05998  | 3.66e-01 | 0.545 |
| N^A(t)                     | -0.00216 | 6.11e-04 | 0.980 |
| N^A(t):cd4.0               | 0.04550  | 2.25e-01 | 0.635 |
| N^A(t):cd4.200             | -0.06772 | 5.54e-01 | 0.457 |
| N^A(t):cd4.350             | -0.09623 | 1.12e+00 | 0.290 |
| N^A(t):cd4.500             | -0.02389 | 7.02e-02 | 0.791 |
| GLOBAL                     | NA       | 2.35e+01 | 0.375 |

Table 7: Proportional hazards test on covariates for weight model.

|                      | rho       | chisq    | p       |
|----------------------|-----------|----------|---------|
| as.factor(male)1     | -0.024698 | 7.76e-01 | 0.37846 |
| cdcclass_bA          | -0.016814 | 3.64e-01 | 0.54604 |
| cdcclass_bB          | -0.010932 | 1.55e-01 | 0.69383 |
| cdcclass_bC          | -0.024645 | 2.28e+00 | 0.13105 |
| cdcclass_bN          | -0.028996 | 2.31e+00 | 0.12854 |
| ns(age_b_c, df = 3)1 | -0.043891 | 2.47e+00 | 0.11630 |
| ns(age_b_c, df = 3)2 | 0.000578  | 4.33e-04 | 0.98340 |
| ns(age_b_c, df = 3)3 | -0.028656 | 1.06e+00 | 0.30257 |
| ns(cd4mr, df = 2)1   | -0.016403 | 1.39e-01 | 0.70927 |
| ns(cd4mr, df = 2)2   | -0.026378 | 8.96e-01 | 0.34385 |
| ns(wazmr, df = 3)1   | 0.041298  | 1.52e+00 | 0.21744 |
| ns(wazmr, df = 3)2   | 0.052773  | 2.30e+00 | 0.12943 |
| ns(wazmr, df = 3)3   | 0.012629  | 1.52e-01 | 0.69683 |
| ns(hazmr, df = 3)1   | -0.046355 | 2.74e+00 | 0.09774 |
| ns(hazmr, df = 3)2   | -0.011046 | 1.40e-01 | 0.70797 |
| ns(hazmr, df = 3)3   | 0.004891  | 2.83e-02 | 0.86651 |
| GLOBAL               | NA        | 1.89e+01 | 0.27388 |

To empirically check why results from the weighted and unweighted analyses differ, we compare the distributions of baseline covariates (mean (SD) or count(%)) between ‘immediate initiation’ and ‘never treat’, shown in the table below. Significant differences are observed in the distributions of CD4, WAZ and HAZ, between the two groups of patients, and ignoring covariate imbalance (unweighted analysis) would lead to biased conclusion.

Table 8: Comparing baseline covariates between ‘immediate initiation’ and ‘never treat’.

|              | Immediate initiation<br><i>n</i> = 885 | Never treat<br><i>n</i> = 616 | <i>p</i> value |
|--------------|----------------------------------------|-------------------------------|----------------|
| CD4          | 249.54 (285.01)                        | 512.42 (328.65)               | <.001          |
| WAZ          | -2.73 (1.80)                           | -2.25 (1.65)                  | <.001          |
| HAZ          | -2.16 (1.42)                           | -1.85 (1.52)                  | .001           |
| Age          | 12.26 (1.42)                           | 12.20 (1.42)                  | .452           |
| CDC class    |                                        |                               | .009           |
| mild         | 89 (10.1%)                             | 67 (10.9%)                    |                |
| moderate     | 35 ( 4.0%)                             | 15 ( 2.4%)                    |                |
| severe       | 50 ( 5.6%)                             | 18 ( 2.9%)                    |                |
| asymptomatic | 77 ( 8.7%)                             | 76 (12.3%)                    |                |
| Male         | 414 (46.8%)                            | 246 (39.9%)                   | .010           |

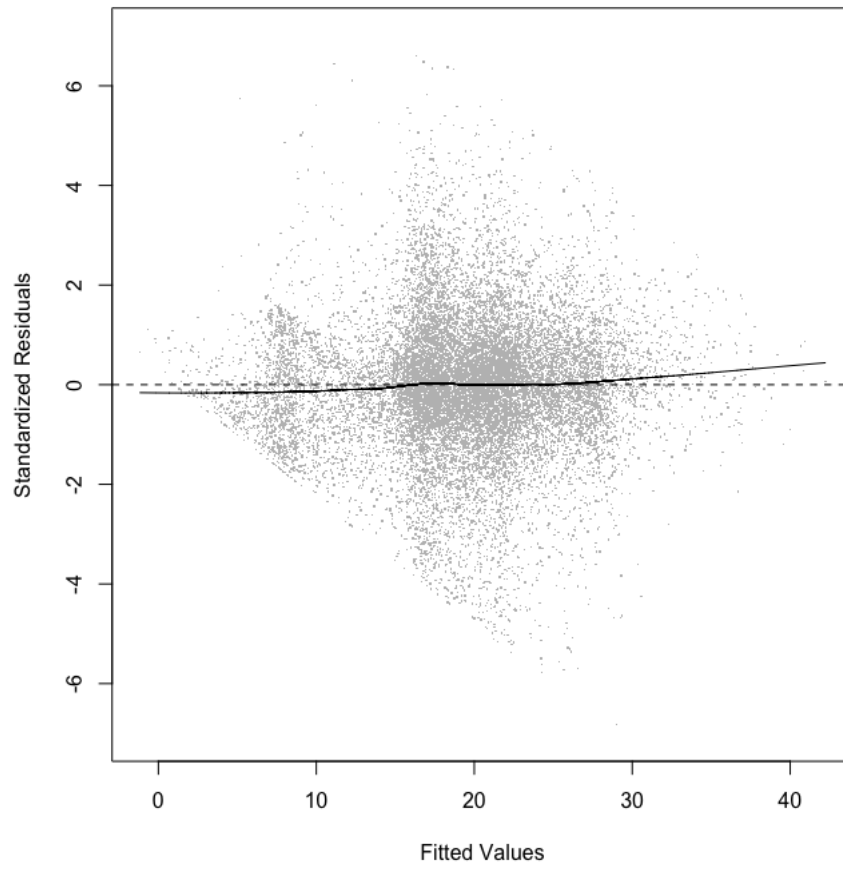

Figure 1: Residual-versus-fitted plot for CD4 submodel, with lowess curve.

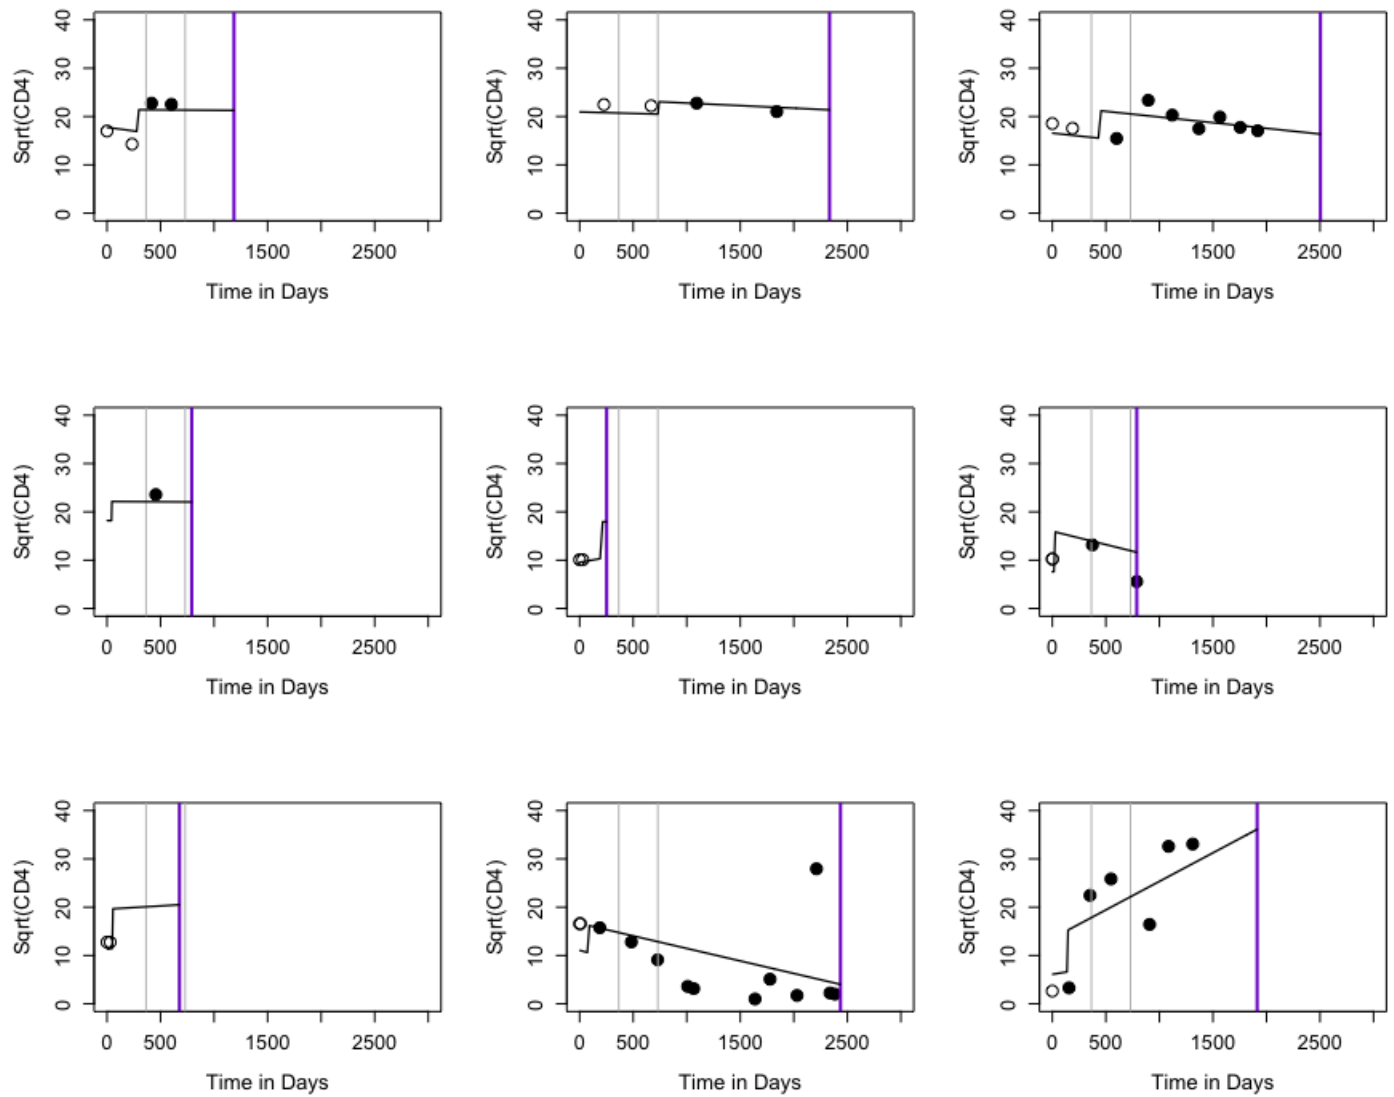

Figure 2: Fitted lines from imputation model for CD4 and ART initiation status during follow up for the 9 randomly selected individuals in Figure 1 from the main text. Empty circles indicate no ART and filled circles represent on ART. Two gray lines denote one year and two years post diagnosis. Purple line indicates end of follow up.

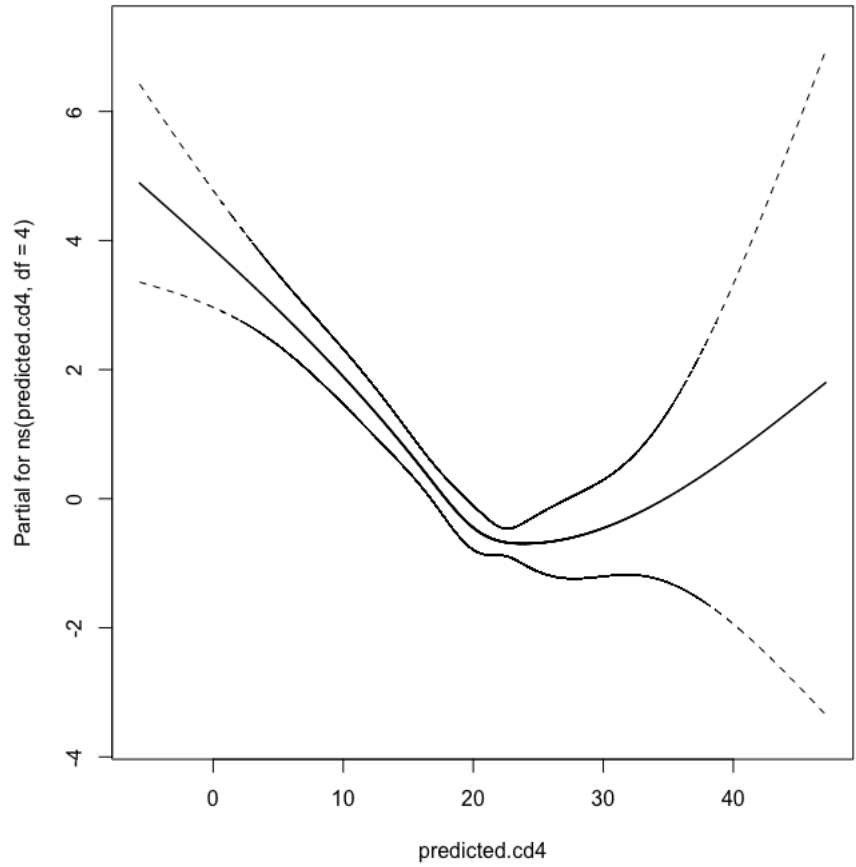

Figure 3: Effect of fitted CD4  $\hat{m}(t)$  on hazard of death at  $t$  in mortality submodel.
